# Supplementary material for: An Integrated Approach of Bioassays and Non-Target Screening for the Assessment of Endocrine-Disrupting Activities in Tap Water and Identification of Novel Endocrine-Disrupting Chemicals
Source: MDPI journal article supplement (doi:10.3390/toxics12040247), 2024-03-28
Supplement: s1 [file s1]

Supplementary materials

# An Integrated Approach of Bioassays and Non-Target Screening for the Assessment of Endocrine-Disrupting Activities in Tap Water and Identification of Novel Endocrine-Disrupting Chemicals

Siyuan Liu <sup>1,2</sup> and Jing Liu <sup>1,2,\*</sup>

**Table S1.** Information on 43 external standards.

| Name                             | Formula      | CAS number  | Reported bioactivity | References |
|----------------------------------|--------------|-------------|----------------------|------------|
| Diethyl phthalate                | C12H14O4     | 84-66-2     | ER↑                  | [75]       |
| Dibutyl phthalate                | C16H22O4     | 84-74-2     | ER↑, ER↓             | [76, 77]   |
| Diisobutyl phthalate             | C16H22O4     | 84-69-5     | ER↑                  | [76]       |
| Dipentyl phthalate               | C18H26O4     | 131-18-0    | ER↑, ER↓             | [76]       |
| Dioctyl phthalate                | C24H38O4     | 117-84-0    | ER↑                  | [78]       |
| Dinonyl phthalate                | C26H42O4     | 84-76-4     | ER↑                  | [78]       |
| Dicyclohexyl phthalate           | C20H26O4     | 84-61-7     | ER↑, ER↓             | [76]       |
| Diphenyl phthalate               | C20H14O4     | 84-62-8     | -                    |            |
| Benzyl butyl phthalate           | C19H20O4     | 85-68-7     | ER↑, ER↓             | [76, 77]   |
| Dimethylglycol phthalate         | C14H18O6     | 117-82-8    | -                    |            |
| Diethoxyethyl phthalate          | C16H22O6     | 605-54-9    | -                    |            |
| Bis(2-butoxyethyl) phthalate     | C20H30O6     | 117-83-9    | -                    |            |
| Pentachlorophenol                | C6HCl5O      | 87-86-5     | ER↑, ER↓, PR↓        | [79]       |
| Tetrabromobisphenol A            | C15H12Br4O2  | 79-94-7     | ER↑, PR↓             | [79]       |
| Phenol                           | C6H6O        | 108-95-2    | -                    |            |
| Parathion-methyl                 | C8H10NO5PS   | 298-00-0    | -                    |            |
| Malathion                        | C10H19O6PS2  | 121-75-5    | ER↑, GR↓             | [80, 81]   |
| Dimethoate                       | C5H12NO3PS2  | 60-51-5     | ER↑, MR↓             | [82, 83]   |
| Bentazone                        | C10H12N2O3S  | 25057-89-0  | -                    |            |
| Perfluoropentanoic acid          | C5HF9O2      | 2706-90-3   | -                    |            |
| Perfluorohexanoic acid           | C6HF11O2     | 307-24-4    | -                    |            |
| Perfluoroheptanoic acid          | C7HF13O2     | 375-85-9    | -                    |            |
| Pentadecafluorooctanoic acid     | C8HF15O2     | 335-67-1    | ER↑                  | [84]       |
| Nonafluorobutane-1-sulfonic acid | C4HF9O3S     | 375-73-5    | -                    |            |
| Perfluorohexane-1-sulphonic acid | C6HF13O3S    | 355-46-4    | ER↑                  | [85]       |
| Perfluoroheptanesulfonic acid    | C7HF15O3S    | 375-92-8    | -                    |            |
| Perfluorooctanesulfonic acid     | C8HF17O3S    | 1763-23-1   | ER↑                  | [85]       |
| Imidacloprid                     | C9H10ClN5O2  | 138261-41-3 | ER↑                  | [86]       |
| Imidaclothiz                     | C7H8ClN5O2S  | 105843-36-5 | -                    |            |
| Thiamethoxam                     | C8H10ClN5O3S | 153719-23-4 | -                    |            |
| Clothianidin                     | C6H8ClN5O2S  | 210880-92-5 | -                    |            |
| Thiacloprid                      | C10H9ClN4S   | 111988-49-9 | ER↑                  | [86]       |
| Acetamiprid                      | C10H11ClN4   | 135410-20-7 | -                    |            |
| Dinotefuran                      | C7H14N4O3    | 165252-70-0 | -                    |            |
| Nitenpyram                       | C11H15ClN4O2 | 150824-47-8 | -                    |            |
| Thiacloprid-amide                | C10H11ClN4OS | 676228-91-4 | -                    |            |
| N-desmethyl-acetamiprid          | C9H9ClN4     | 190604-92-3 | -                    |            |
| Flonicamid                       | C9H6F3N3O    | 158062-67-0 | -                    |            |
| Benzo[a]pyrene                   | C20H12       | 50-32-8     | ER↑, ER↓, PR↑, GR↓   | [87]       |
| Benzo[b]fluoranthene             | C20H12       | 205-99-2    | -                    |            |
| Benzo[k]fluoranthene             | C20H12       | 207-08-9    | -                    |            |
| 3-phenoxy benzoic acid           | C13H10O3     | 3739-38-6   | GR↓                  | [11]       |
| 4-fluoro-3-phenoxy benzoic acid  | C13H9FO3     | 77279-89-1  | -                    |            |

All external standards were obtained from Tan-Mo Technology Co., Ltd. (Changzhou, China). ER: estrogen receptor. PR: progesterone receptor. GR: glucocorticoid receptor. MR: mineralocorticoid receptor. ↑ : agonistic activity. ↓ : antagonistic activity. - represents no agonistic or antagonistic activity in ER, PR, GR, or MR assays reported in the literature.

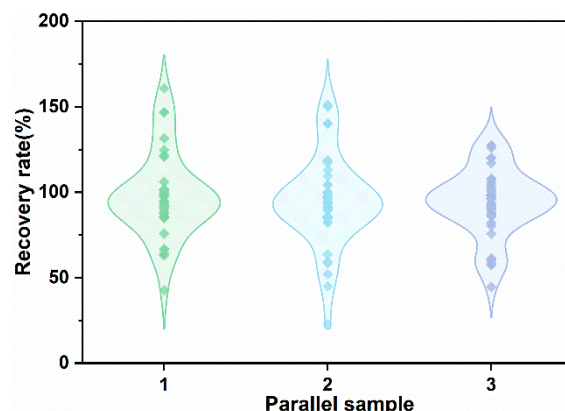

Figure S1. Violin plot of recovery rates of 43 external standards.

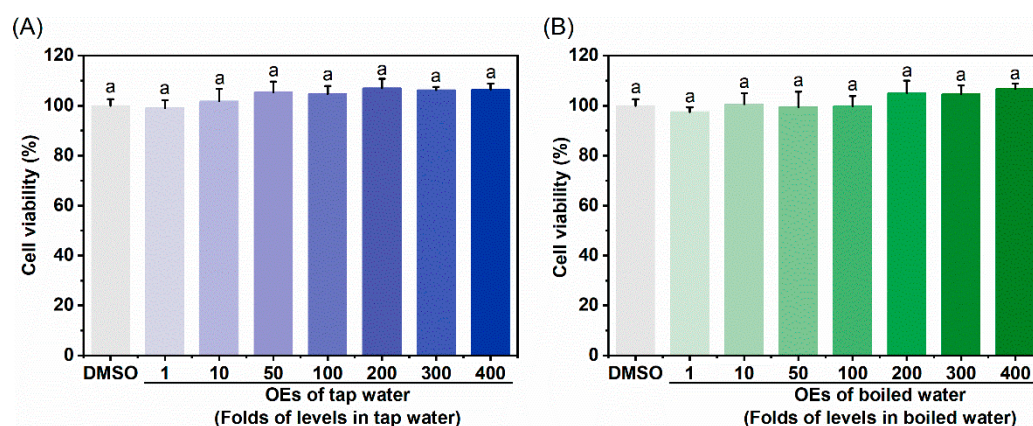

Figure S2. The viability of CHO-K1 cells exposed to OEs from tap water without or with boiling. (A) The cytotoxicity of OEs of tap water to CHO-K1 cells. CHO-K1 cells were exposed to the OEs of tap water or 1% DMSO (as vehicle control) for 24h. (B) The cytotoxicity of OEs of boiled water to CHO-K1 cells. CHO-K1 cells were exposed to the OEs of boiled water or 1% DMSO (as vehicle control) for 24h. Results were expressed as percent of control. Data are shown as mean±SD (n=6). Different letters on bars indicate significant differences among treatments ( $p < 0.05$ ).

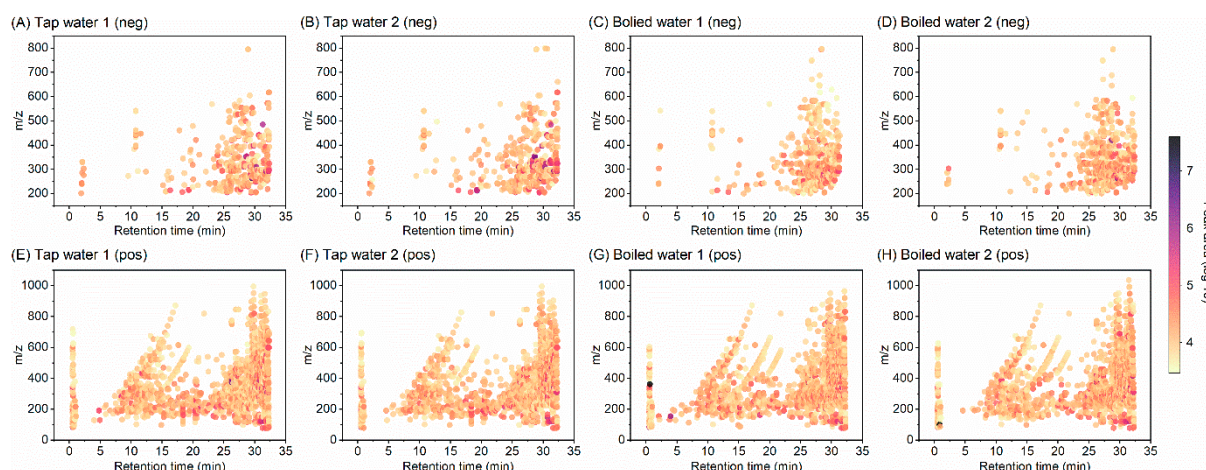

Figure S3. Plots of  $m/z$  and retention time of the non-target features detected per sample for negative (A, B, C, D) and positive (E, F, G, H) ionization. The color presents the peak area of a certain feature.

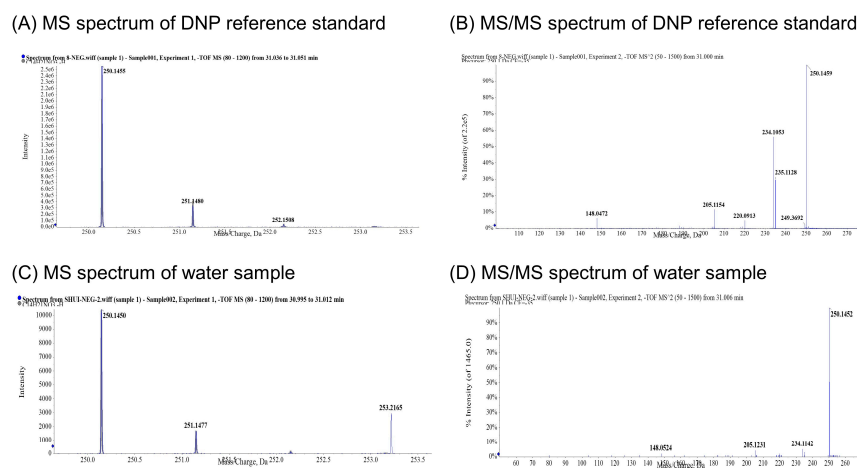

Figure S4 MS and MS/MS spectrum of DNP (precursor  $m/z$  250.1) identified in the water sample.

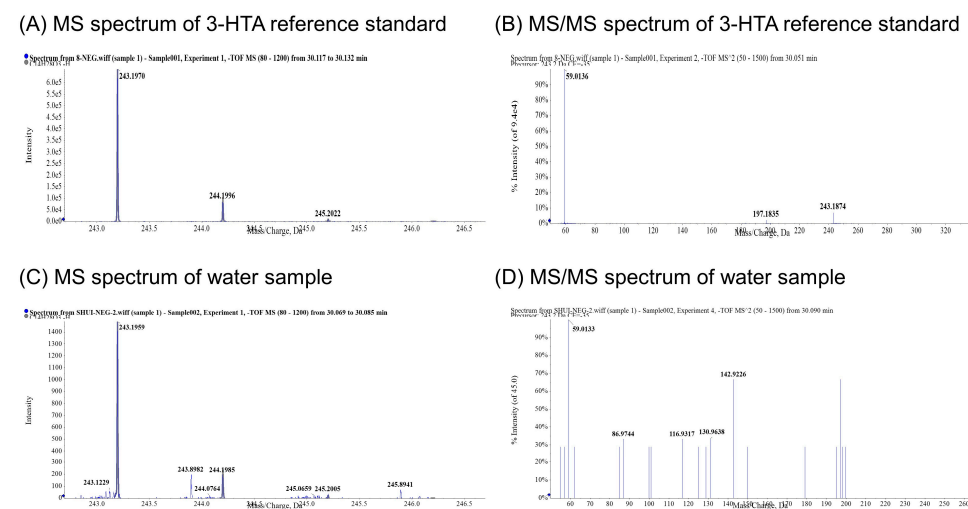

Figure S5 MS and MS/MS spectrum of 3-HTA (precursor  $m/z$  243.2) identified in the water sample.

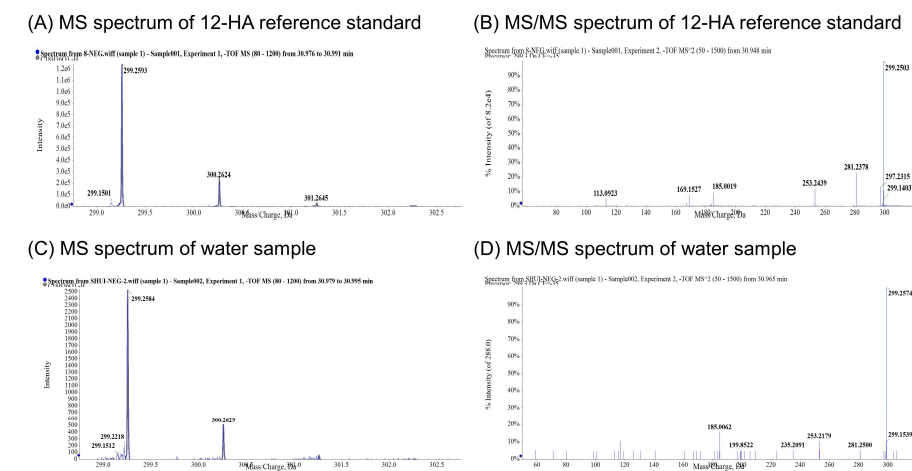

Figure S6 MS and MS/MS spectrum of 12-HA (precursor  $m/z$  299.3) identified in the water sample.

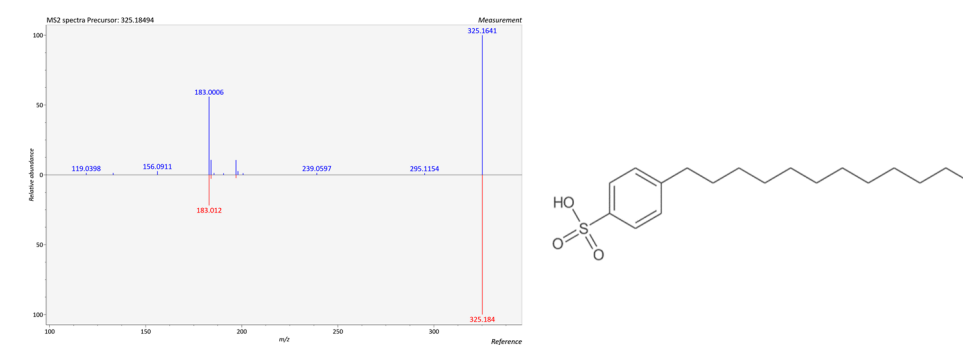

**Figure S7** Spectral similarity of  $m/z$  325.184  $[M-H]^-$  to MassBank spectrum of DBSA.

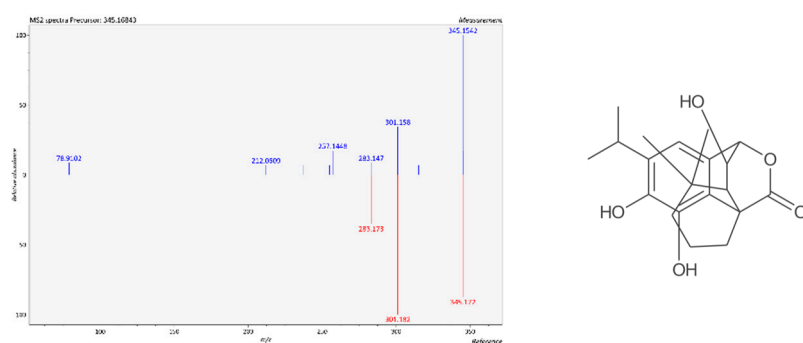

**Figure S8** Spectral similarity of  $m/z$  345.168  $[M-H]^-$  to MassBank spectrum of ISO.

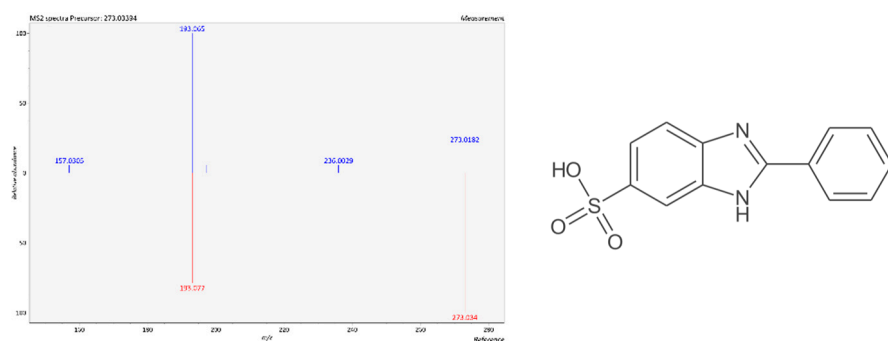

**Figure S9** Spectral similarity of  $m/z$  273.033  $[M-H]^-$  to MassBank spectrum of PBSA.

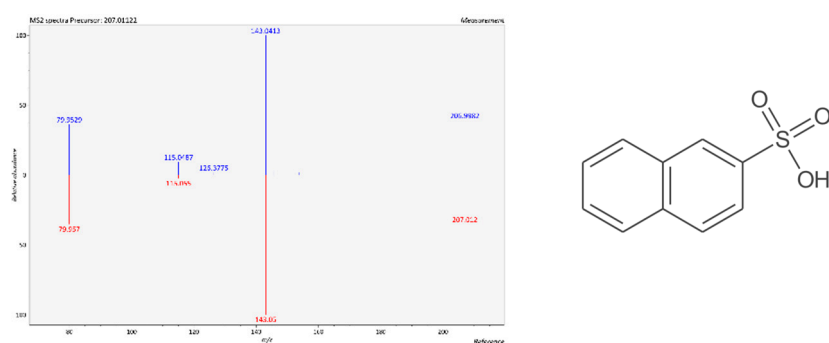

**Figure S10** Spectral similarity of  $m/z$  207.011  $[M-H]^-$  to MassBank spectrum of 2-NSA.

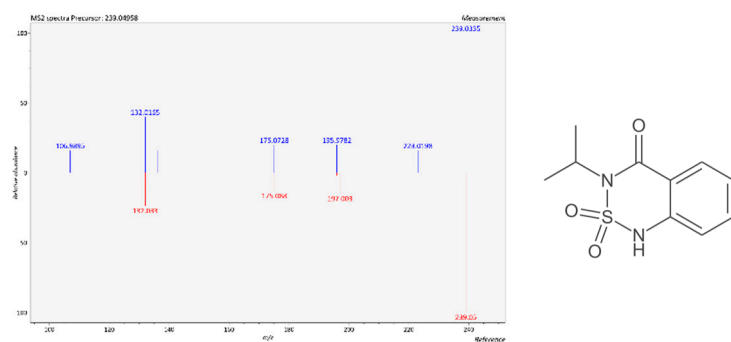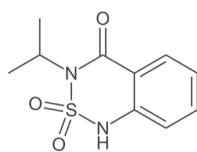

**Figure S11** Spectral similarity of  $m/z$  239.049  $[M-H]^-$  to MassBank spectrum of BEN.
